# Supplementary material
Source: publisher site journal article supplement (https://www.dovepress.com/article/298556)
Supplement: Supplementary file 1 [file get_supplementary_file.php]

**Supplementary material 1**

The instructional video. The video included narration and subtitles that described the light-curing steps, and demonstraed how to perform the curing technique on the anterior and posterior teeth of the MARC-PS.

**Supplementary material 2**

**Light-curing unit technique exercise rubric**

| **Course:** | **Preclinical Operative Dentistry** |
| --- | --- |

| **Experimental group** | Instructional video | | | Verbal Instructions |
| --- | --- | --- | --- | --- |
|  | | | | |
| **Gender** |  | | | |
| **Student serial no.** |  | | | |
| **Date** |  | | | |
| **Attended lecture** | **Yes** | **No** | **Comments:** | |

| **Light-curing unit technique exercise rubric** | | **Performed** | | **Comments** |
| --- | --- | --- | --- | --- |
| **Yes** | **No** |
|  | Checking the light curing unit light guide tip is **clean and not broken** |  |  |  |
|  | Wearing the blue light blocker **orange protective goggles** |  |  |  |
|  | Did not place the blue light blocker **orange protective goggles** on the patient simulator |  |  |  |
|  | Placing the light guide tip **perpendicular** to the tooth being cured |  |  |  |
|  | Placing the light guide tip **as close as possible** to the surface (1-2 mm away from the surface) without touching the surface |  |  |  |
|  | **Finger support** the light guide tip |  |  |  |
|  | Keeping the **eye on the filling** for the entire curing cycle |  |  |  |
|  | Light curing |  |  |  |

| **Examiner** |  |
| --- | --- |

**Supplementary material 3**

**Students' feedback on teaching light-curing by**

**instructional video vs. verbal instructions**

Please provide feedback on your opinion on the light-curing instructional method you performed

1. Gender
   - Male
   - Female
2. Assigned serial number
   - _____________
3. Instructional method group
   - Instructional video
   - Verbal instructions
4. Rate the instructional method provided (5 is the highest)
   - 1
   - 2
   - 3
   - 4
   - 5
5. What comments do you have about your experience?
   - ________________________________________________________________________________________________________________________________________________________________________________________________________________________________________________________
6. In general, and not restricted to this experiment, which teaching method do you prefer?
   - Instructional video
   - Verbal instructions
   - Both complement each other
7. Why did you choose that teaching method? Please add your comments
   - ________________________________________________________________________________________________________________________________________________________________________________________________________________________________________________________

Thank you for your participation.

**Supplementary material 4**

**Examiners' feedback on the students' light-curing performance**

**(Instructional video vs. verbal instructions)**

Please provide feedback on your opinion on the students’ light-curing performance

1. Examiner
   - Examiner 1
   - Examiner 2
2. Based on your observation, which teaching method improved the students' light-curing performance?
   - Instructional video
   - Verbal instructions
3. Why did you select your answer? Please add your comments
   - ____________________________________________________________________________________________________________________________________________________________________________________________________________________________________________
4. What were the students' verbal comments on each teaching method?
   - ____________________________________________________________________________________________________________________________________________________________________________________________________________________________________________

Thank you for your feedback.
